# Supplementary material for: Cyclic and acyclic sulfonimides in reactions with Rh(ii)-ketocarbenoids: a new access to chemoselective O-functionalization of the imidic carbonyl groups
Source: Royal Society of Chemistry journal article supplement (doi:10.1039/b508317f), 2005-01-01
Supplement: b508317f.pdf [file b508317f.pdf]

## Cyclic and acyclic sulfonimides in reactions with Rh(II)-ketocarbenoids: a new access to chemoselective O-functionalization of the imidic carbonyl groups

V. Nikolaev, L. Hennig, J. Sieler, L. Rodina, B. Schulze and V. Nikolaev

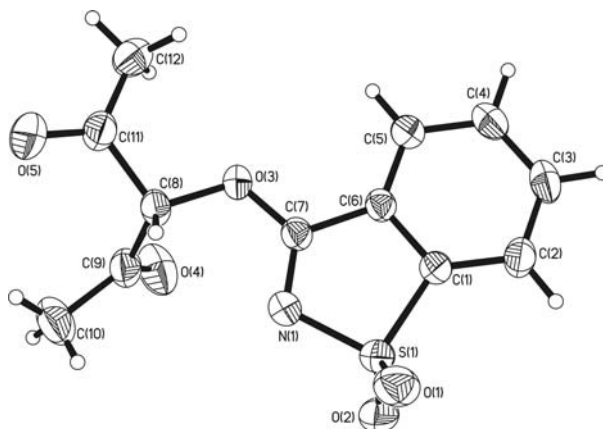

**Fig. S1** X-Ray crystal structure of 3-(diacetyl)-methoxybenzo[*d*]isothiazol 1,1-dioxide **4c**

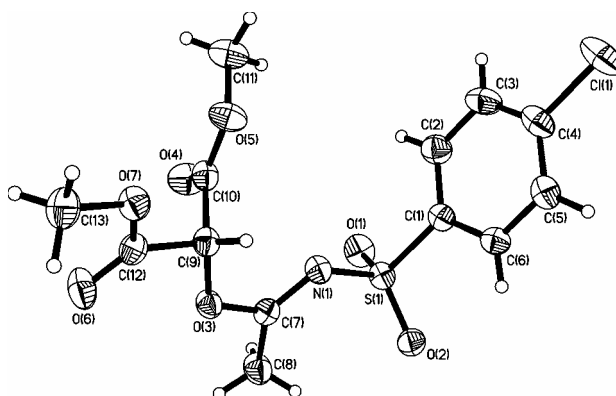

**Fig. S2** X-Ray crystal structure of (dimethoxycarbonyl)-methylester of *N*-(*p*-Cl-benzenesulfonyl)imidoylacetic acid **5b**
